# Supplementary material for: Monodisperse RuO2 nanoparticles for highly transparent and rapidly responsive supercapacitor electrodes
Source: Royal Society of Chemistry journal article supplement (doi:10.1039/d1ta07246c), 2021-01-01
Supplement: d1ta07246c1.pdf [file d1ta07246c1.pdf]

## Supplementary Information

### Monodisperse RuO<sub>2</sub> nanoparticles for highly transparent and rapidly responsive supercapacitor electrodes

*Ilhwan Ryu<sup>†</sup>, Dongju Kim<sup>†</sup>, Guenpyo Choe, Sohyun Jin, Dajung Hong\* and Sanggyu Yim\**

Department of Chemistry, Kookmin University, Seoul 02707, South Korea

\* Corresponding authors: Dajung Hong (solar@kookmin.ac.kr), Sanggyu Yim (sgyim@kookmin.ac.kr)

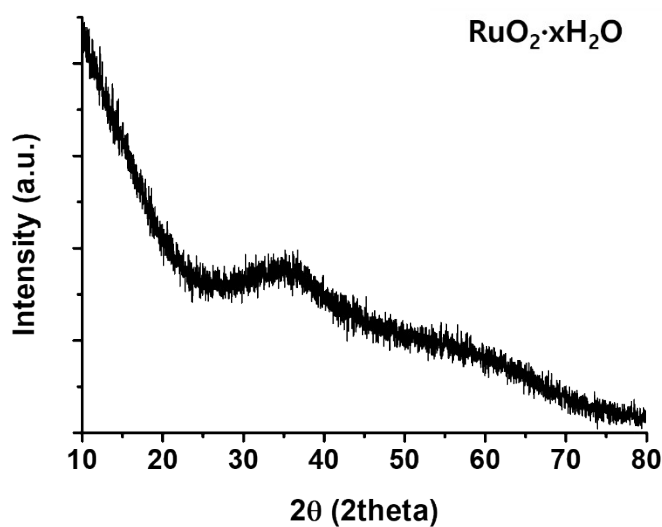

**Figure S1.** Powder X-ray diffraction pattern of the synthesized pristine RuO<sub>2</sub> NPs.

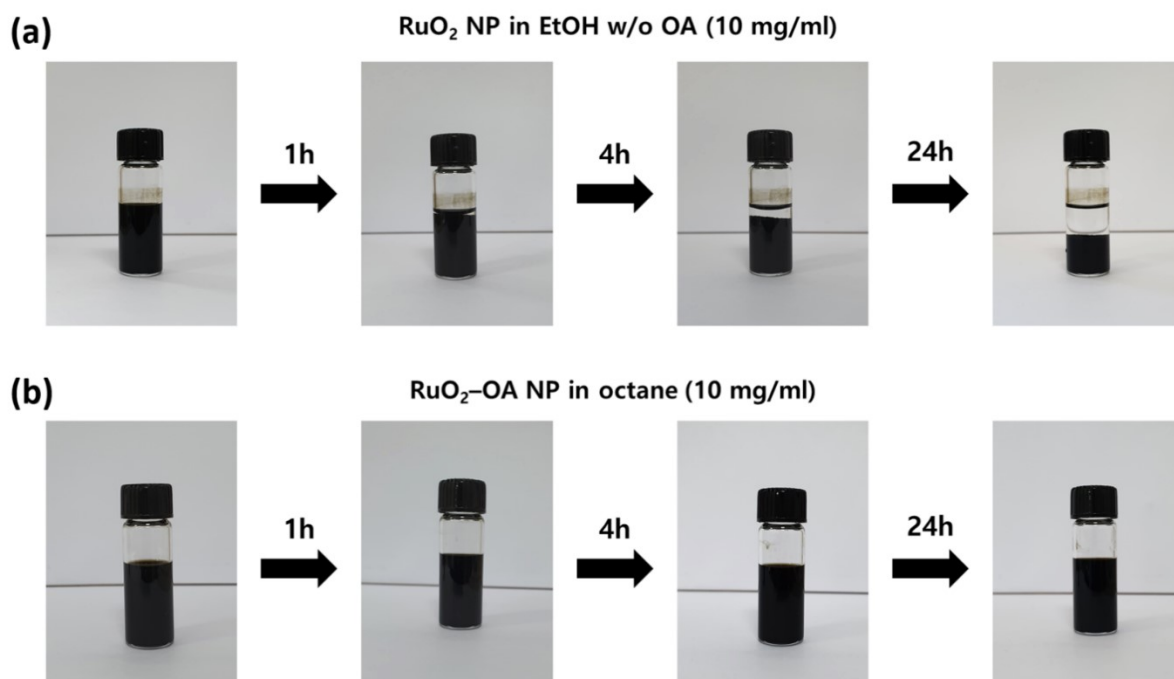

**Figure S2.** Photographs of (a) pristine RuO<sub>2</sub> NPs dispersed in ethanol and (b) OA-decorated RuO<sub>2</sub> NPs dispersed in octane and taken at various times after dissolution.

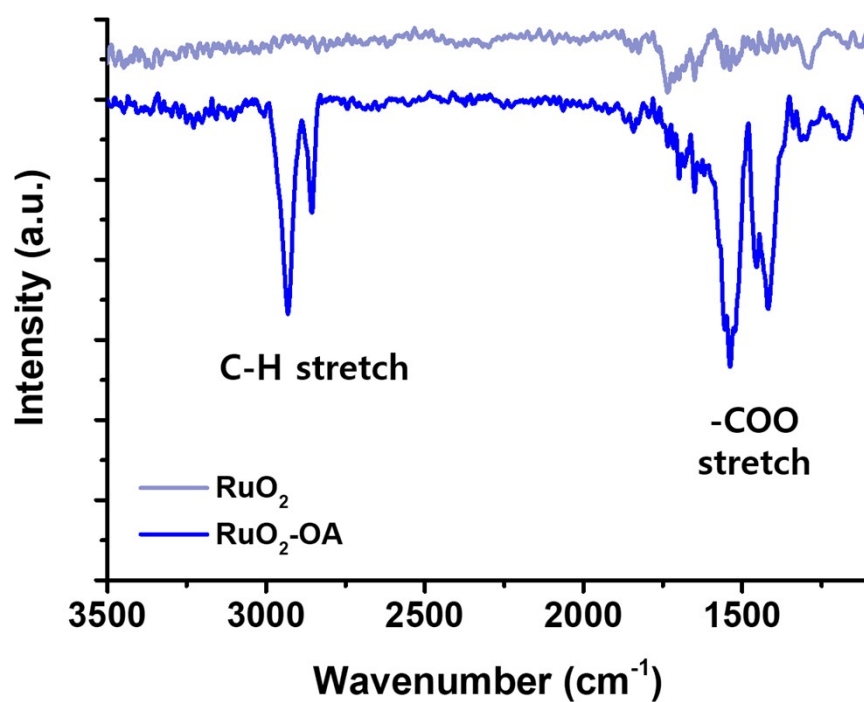

**Figure S3.** FTIR spectra of the pristine and OA-decorated RuO<sub>2</sub> NP-based electrodes.

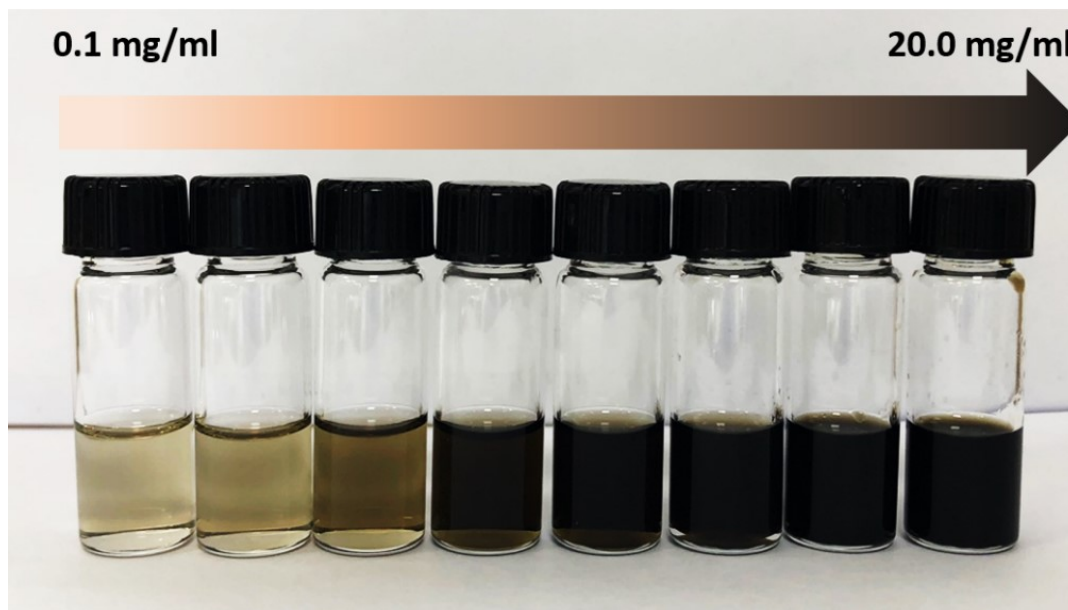

**Figure S4.** Photograph of OA-decorated RuO<sub>2</sub> NPs of various concentrations (from left to right: 0.1, 0.2, 0.5, 1.0, 2.0, 5.0, 10.0, and 20.0 mg/ml) dispersed in octane. Taken after 24 h of dissolution.

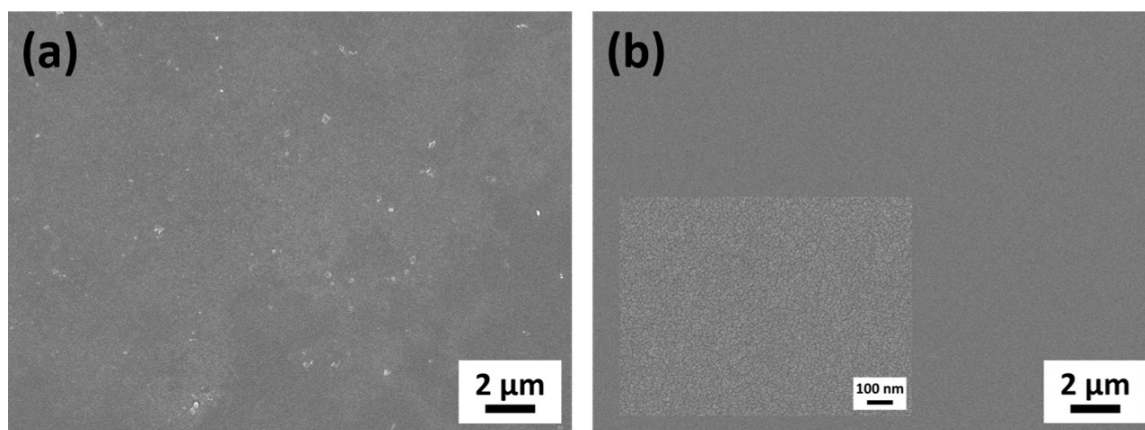

**Figure S5.** Surface FE-SEM images of thin films spin-coated with 10 mg/ml solution of (a) pristine RuO<sub>2</sub> NPs dispersed in ethanol and (b) OA-decorated RuO<sub>2</sub> NPs dispersed in octane.

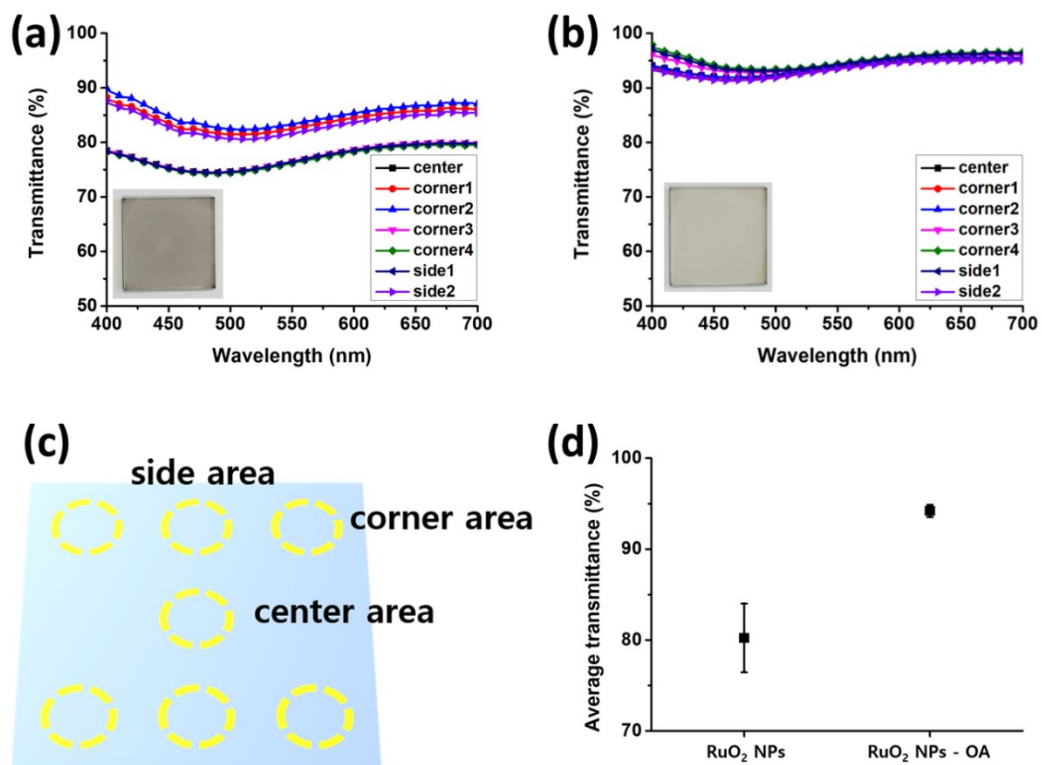

**Figure S6.** Transmittance spectra of thin films spin-coated with 10 mg/ml solution of (a) pristine RuO<sub>2</sub> NPs dispersed in ethanol and (b) OA-decorated RuO<sub>2</sub> NPs dispersed in octane. (c) Schematic illustrating measurement points on the films. (d) Mean and spread of the average transmittance over the visible wavelength range for pristine RuO<sub>2</sub> and RuO<sub>2</sub>-OA NP-coated films.

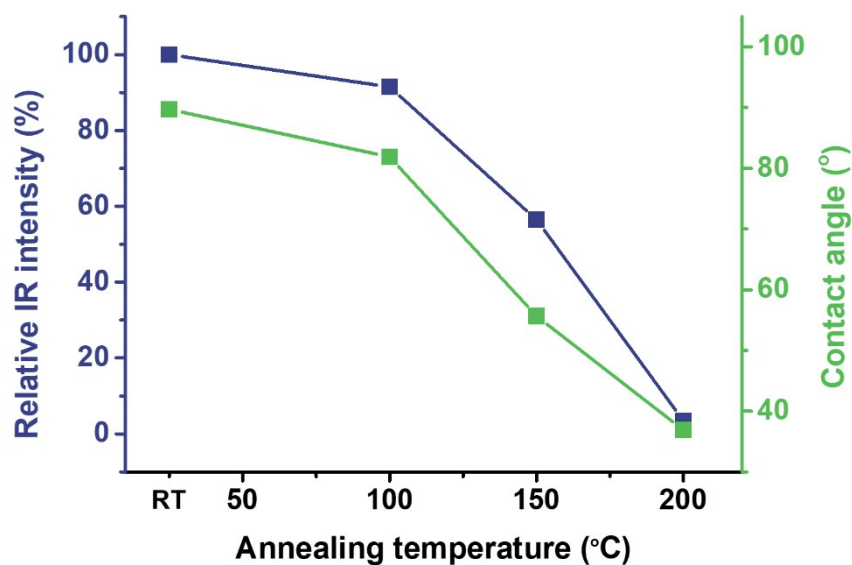

**Figure S7.** Plots of C–H stretching band intensity in FT-IR and water contact angle of the RuO<sub>2</sub>–OA NP-coated films as a function of the annealing temperature.

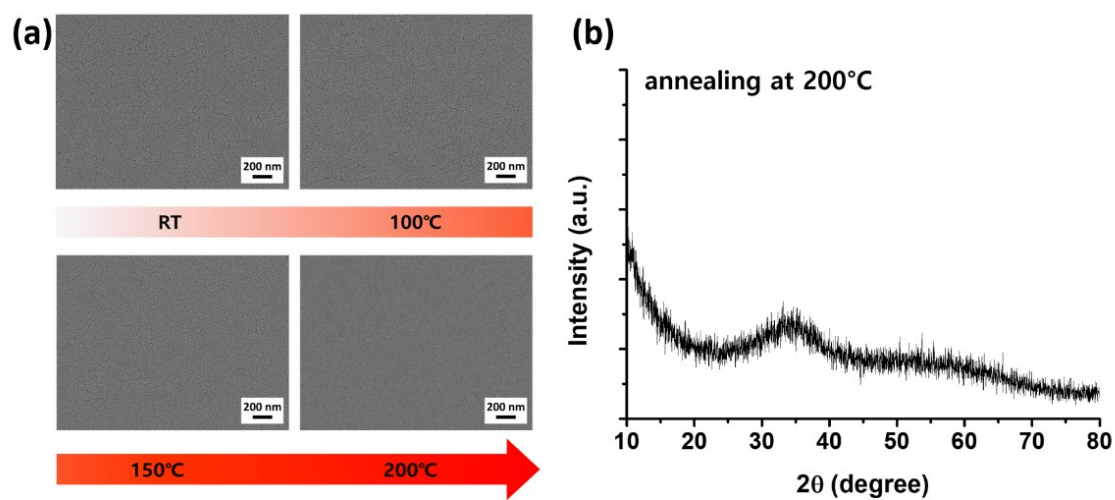

**Figure S8.** (a) Surface FE-SEM images of RuO<sub>2</sub>–OA NP-coated films after annealing at various temperatures for 1 h. (b) Powder X-ray diffraction pattern of the RuO<sub>2</sub>–OA NP-coated films after annealing at 200°C for 1 h.

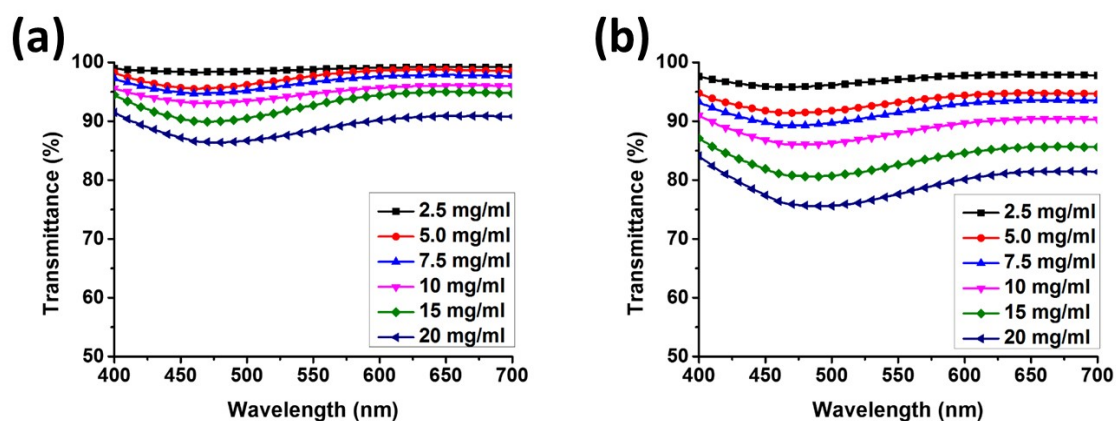

**Figure S9.** Transmittance spectra of RuO<sub>2</sub> NP-based electrodes prepared by (a) single and (b) double deposition of various NP concentration solutions.

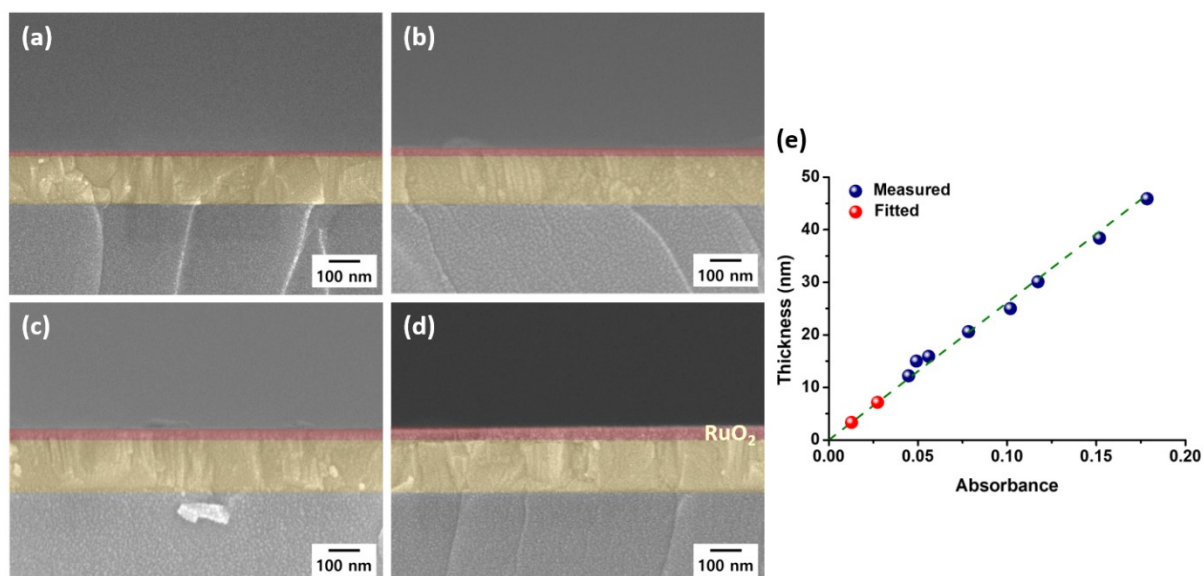

**Figure S10.** Representative cross-sectional FE-SEM images of RuO<sub>2</sub> NP-based electrodes. The RuO<sub>2</sub> film thicknesses were (a) 15.0, (b) 22.3, (c) 38.4 and (d) 44.5 nm. (e) Plot of measured thicknesses as a function of optical absorbance. The thicknesses of the thinnest two films were determined using their absorbance and the fitting line from the measured data.

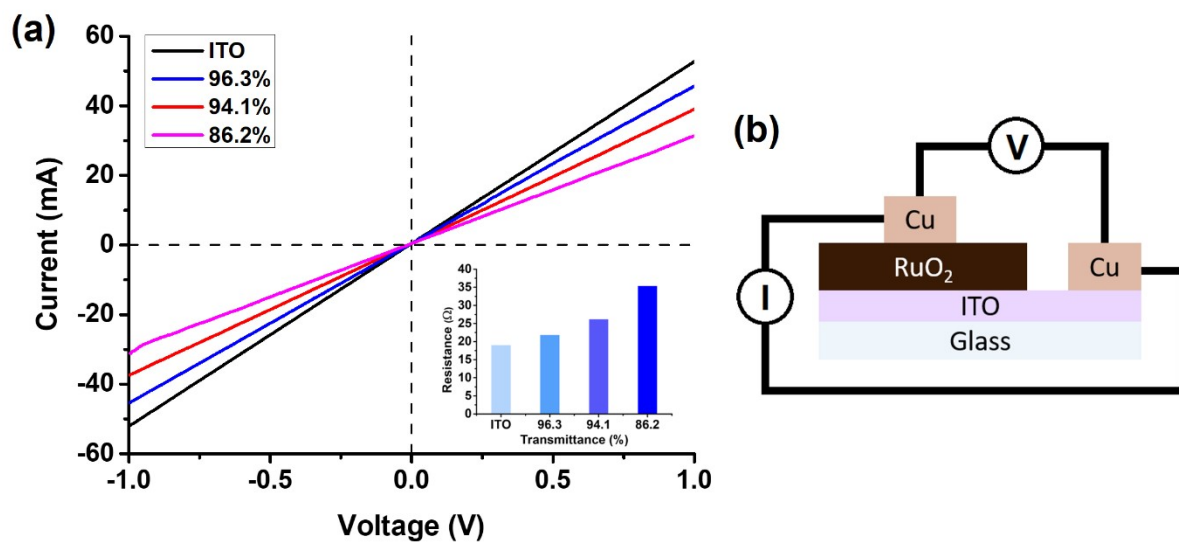

**Figure S11.** (a)  $I$ - $V$  characteristics of RuO<sub>2</sub> NP-based electrodes with various optical transmittances ( $T_{\text{vis}}$ ). (b) A schematic illustration of the  $I$ - $V$  measurement system.

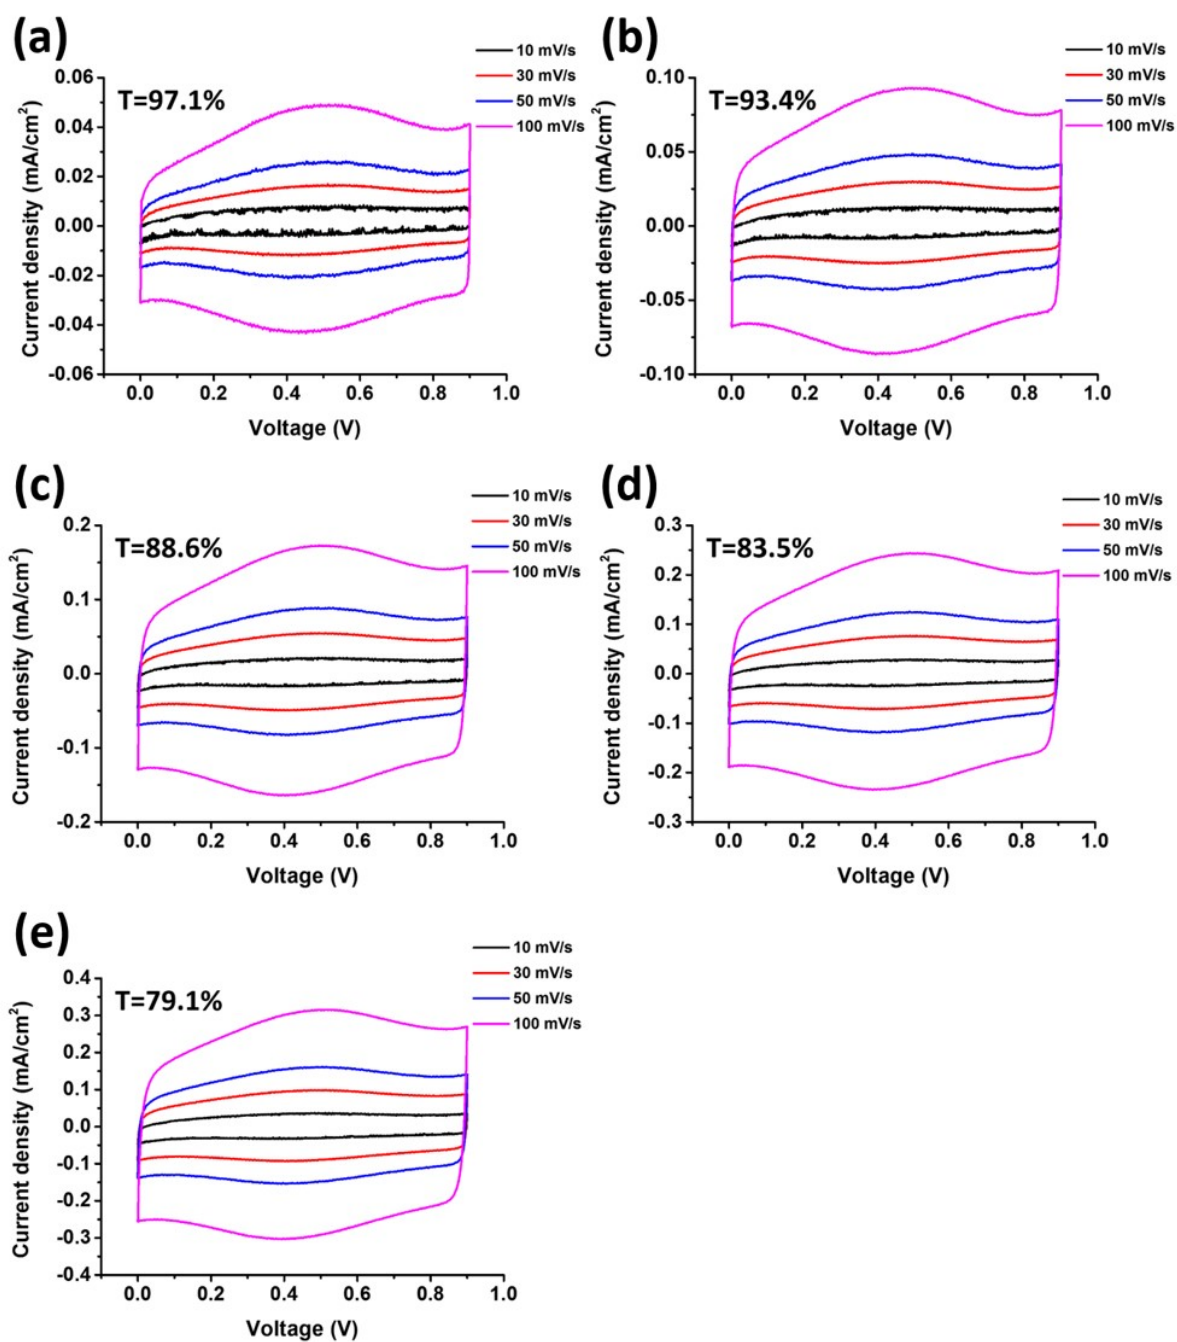

**Figure S12.** Cyclic voltammograms of RuO<sub>2</sub> NP-based transparent electrodes with  $T_{vis}$  of (a) 97.1%, (b) 93.4%, (c) 88.6%, (d) 83.5%, and (e) 79.1% measured at various scan rates.



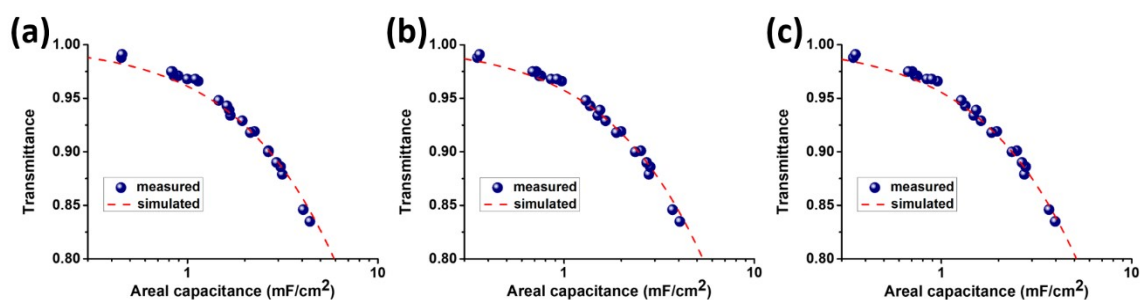

**Figure S13.** Plots of optical transmittance obtained from experiments (blue points) and simulations using Eq. 2 (red dashed lines) as a function of the areal capacitance at scan rates of (a) 10, (b) 50, and (c) 100 mV/s.

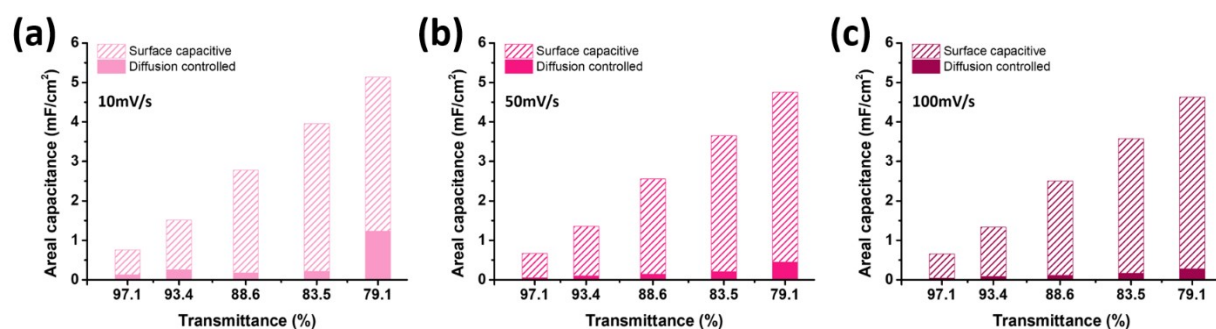

**Figure S14.** Deconvolution of areal capacitances measured at scan rates of (a) 10, (b) 50, and (c) 100 mV/s for RuO<sub>2</sub> NP-based electrodes with various transmittances. The shaded and solid regions represent surface capacitive and diffusion-controlled insertion elements, respectively.

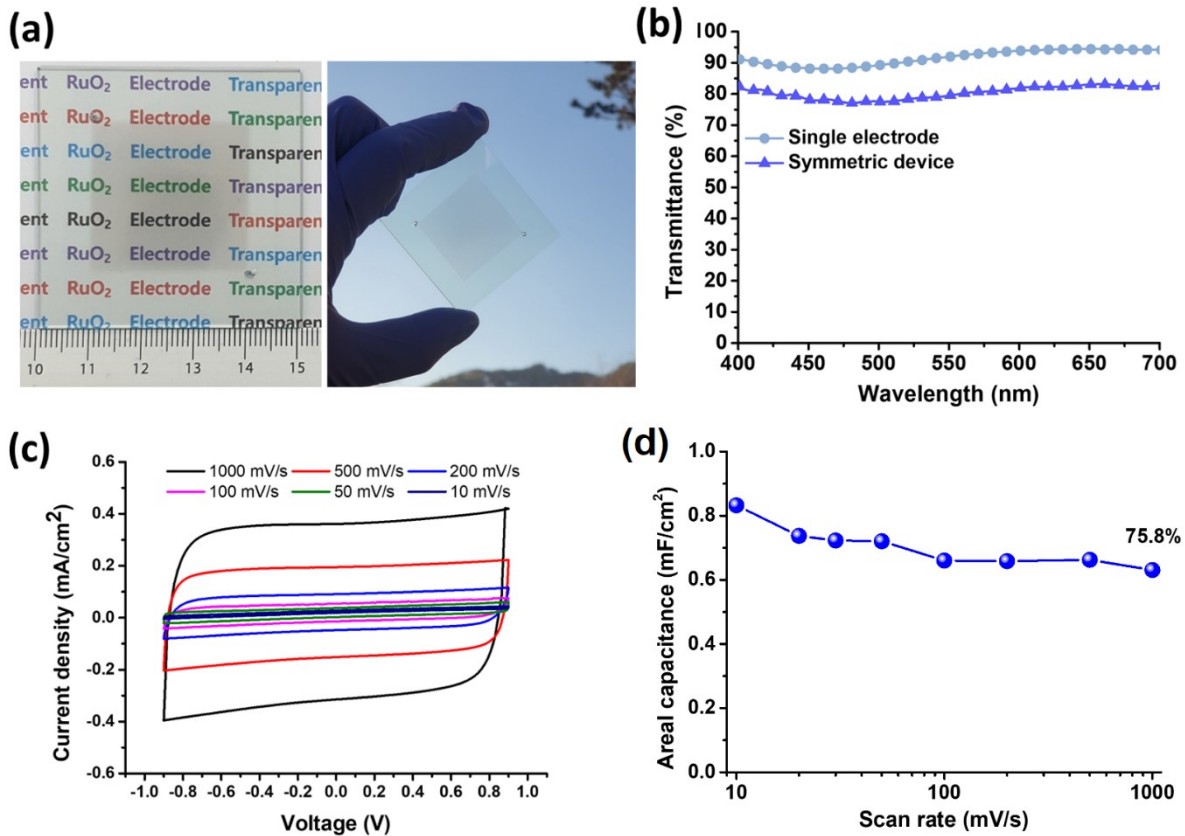

**Figure S15.** (a) Photographs of the large-area full-cell device fabricated by spray-coating of RuO<sub>2</sub> NPs. (b) Transmittance spectra of a single electrode and symmetric device. (c) Cyclic voltammograms of the device measured at various scan rates. (d) Capacitance retention as a function of the scan rate.

**Table S1.** Summary of the relative C–H stretching band intensity in FT-IR and the water contact angle of RuO<sub>2</sub>–OA NP-coated films after annealing at various temperatures for 1 h.

| Annealing temperature (°C) | Relative C-H stretching intensity in FT-IR (%) | Water contact angle (°) |
|----------------------------|------------------------------------------------|-------------------------|
| RT                         | 100                                            | 89.7                    |
| 100                        | 91.5                                           | 81.9                    |
| 150                        | 56.5                                           | 55.7                    |
| 200                        | 3.4                                            | 36.9                    |

**Table S2.** Comparison of the optical transmittance and areal capacitance of transparent supercapacitor electrodes and devices in published literature.

| Active material                     | Transmittance (%) | Areal capacitance (mF/cm <sup>2</sup> ) | Reference                                  |
|-------------------------------------|-------------------|-----------------------------------------|--------------------------------------------|
| Graphene QD*                        | 93.0              | 0.009                                   | Nano Energy <u>26</u> (2016) 746           |
| Graphene*                           | 75.0              | 0.101                                   | Chem. Mater. <u>27</u> (2017) 3621         |
| SWCNT                               | 92.0              | 0.552                                   | Nanotech. <u>27</u> (2016) 235403          |
| Carbon nanocup*                     | 71.0              | 1.22                                    | Sci. Rep. <u>2</u> (2012) 773              |
| PEDOT:PSS*                          | 65.0              | 1.18                                    | J. Mater. Chem. A <u>4</u> (2016) 10493    |
| Au/MnO <sub>2</sub> network         | 76.0              | 3.23                                    | Small <u>13</u> (2017) 1701906             |
| RuO <sub>2</sub> /N-doped graphene* | 34.1              | 1.57                                    | Sustain. Energy Fuels <u>2</u> (2018) 1799 |
| RuO <sub>2</sub> /PEDOT             | 93.0              | 1.20                                    | Nano Energy <u>28</u> (2016) 495           |
| <b>RuO<sub>2</sub> NP</b>           | <b>97.9</b>       | <b>0.85</b>                             | <b>This work</b>                           |
|                                     | <b>93.4</b>       | <b>1.66</b>                             |                                            |

\*Data for devices. The others are data for electrodes
